# Supplementary material
Source: Springer Nature journal article supplement (https://www.springermedizin.de/resource/supplementary/12876_2012_882_MOESM1_ESM.pdf/9437538)

# Cost-effectiveness plane

unadjusted for baseline costs

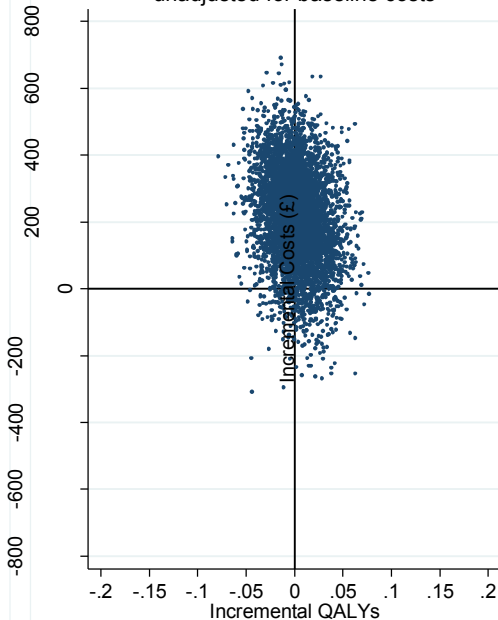

adjusted for baseline costs

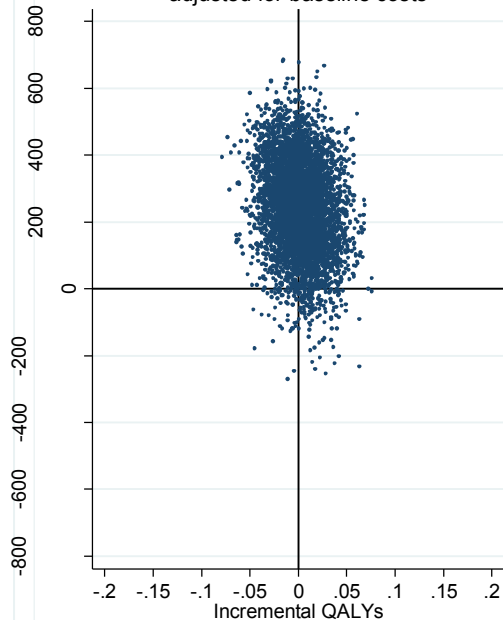

Supplement: MOESM1 [file 9437538]
